# Supplementary material for: Human iPSC-Derived Cardiomyocytes from ALS Patients with C9ORF72 Mutation Exhibit Cellular Hallmarks of ALS Pathology
Source: Research Square preprint supplement (doi:10.21203/rs.3.rs-6782801/v1), 2025-06-16

**Supplementary Figures**


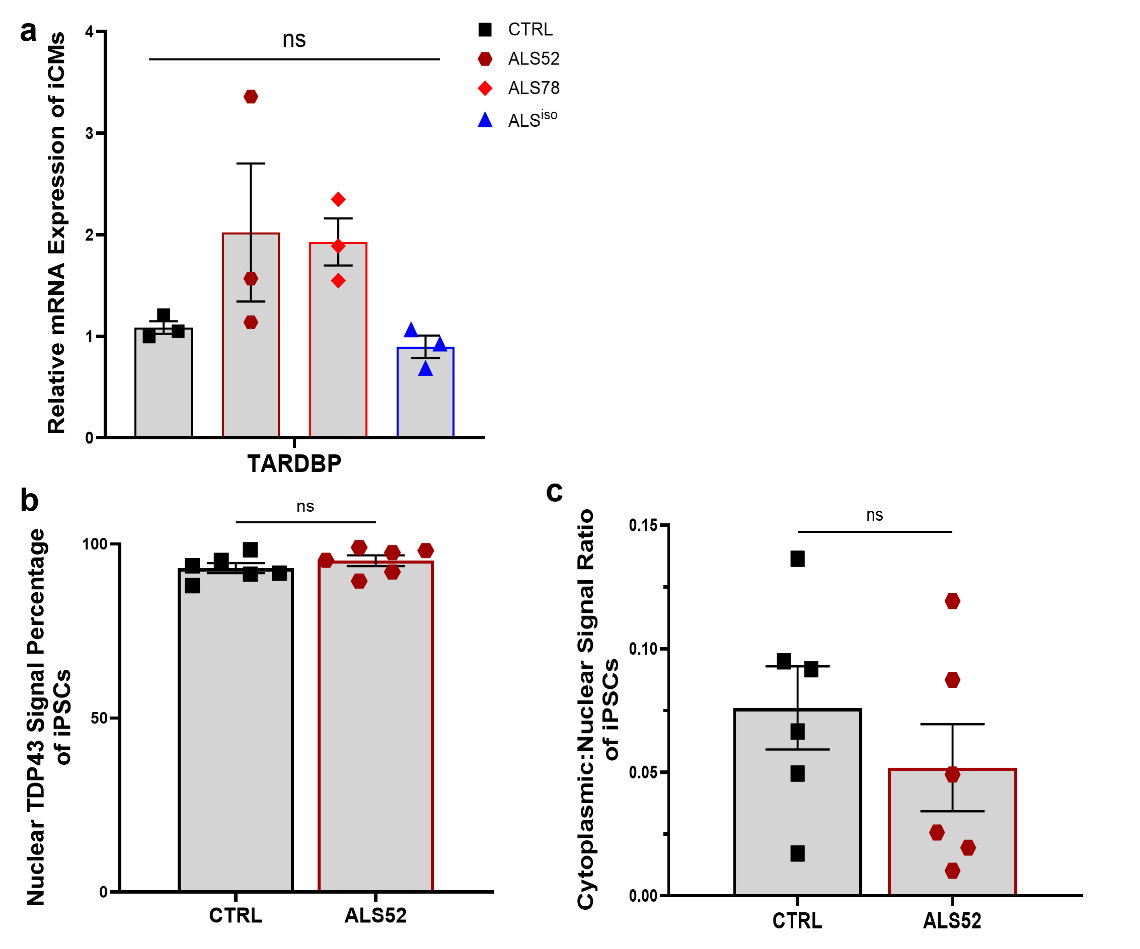


**Figure S1: Evaluation of TARDP gene expression analysis in iCMs and TDP-43 nuclear and cytoplasmic staining in iPSC lines. a.** qRTPCR analysis of *TARDBP* mRNA expression in Day 45 iCMs. **b.** The percentage of the nuclear and **c.** the ratio of cytoplasmic to nuclear TDP-43 protein immunoreactive signal in healthy and patient iPSCs. 6 randomly selected regions were analyzed for each experiment.

**Supplementary Tables**

**Table S1.** Demographic and clinical information of ALS patients, healthy individual and isogenic control to derive the iPSC lines used in the study.

**
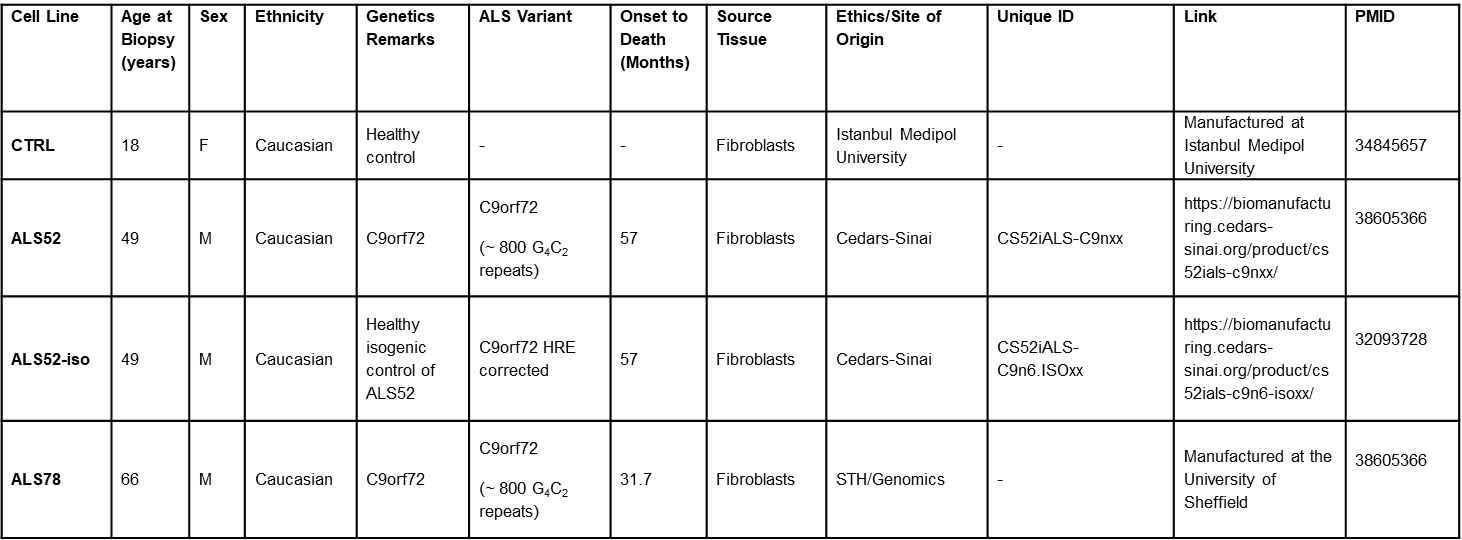
**

**Table S2.** List of qRT-PCR primers


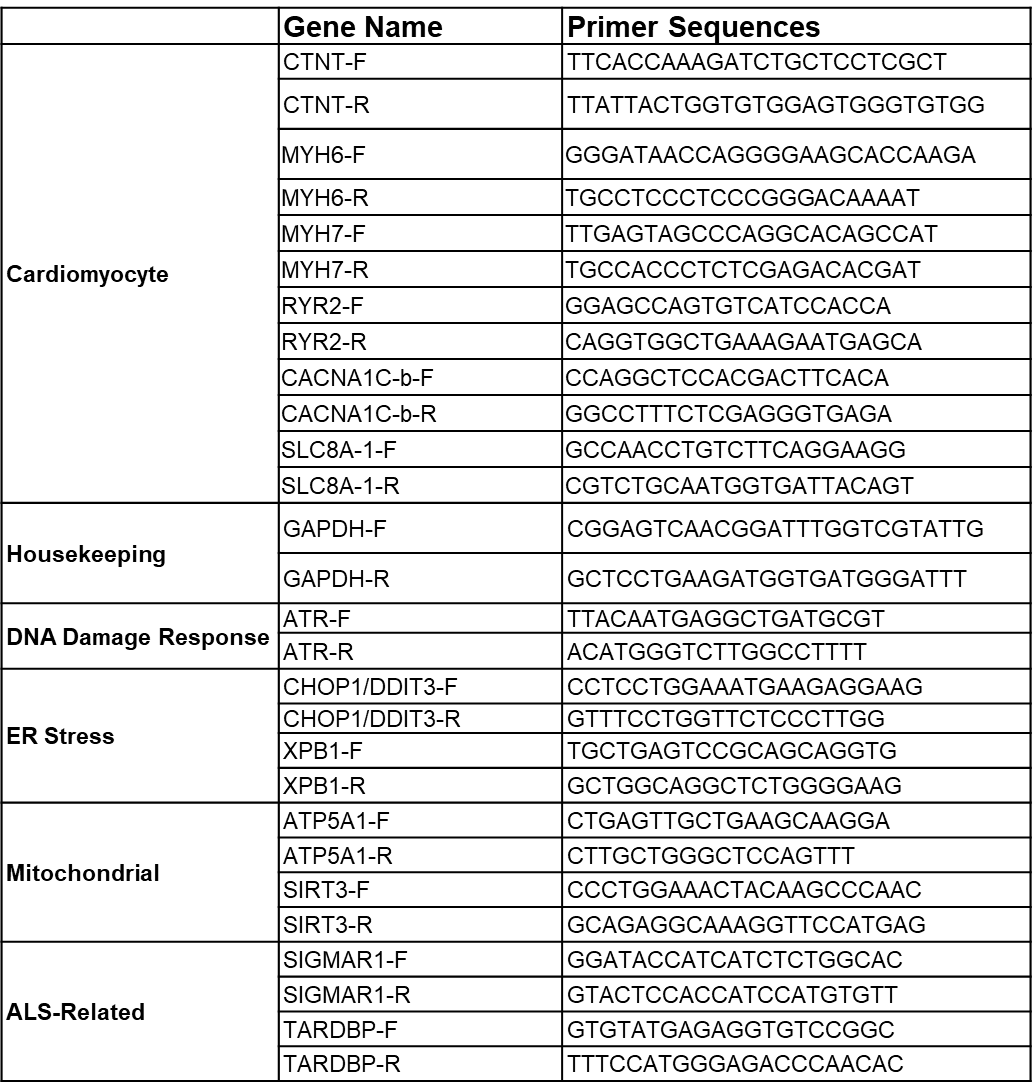


**Table S3.** List of antibodies


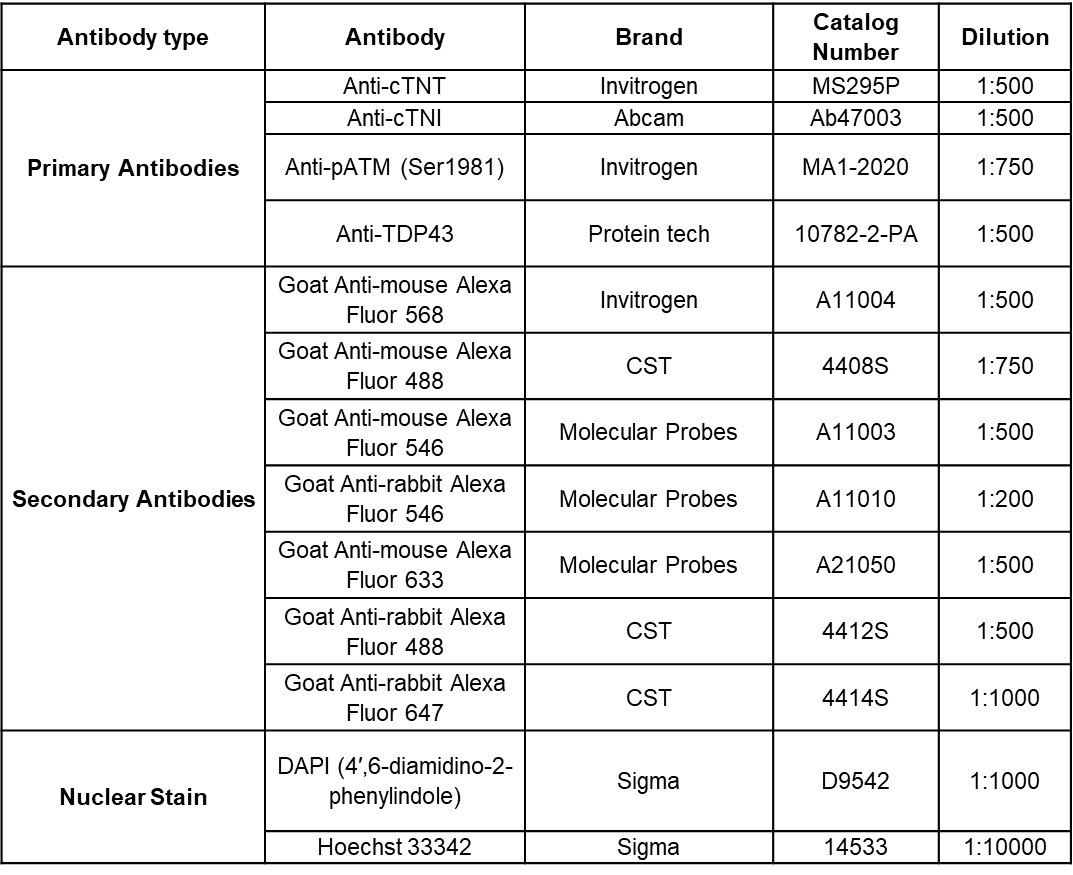

Supplement: Supplementary file 1 [file 416de0e0def780268950a483.docx]
